# Supplementary material
Source: PubMed Central journal article supplement (PMC3323740)

# Supplementary Figure 1: Batch p-value distributions

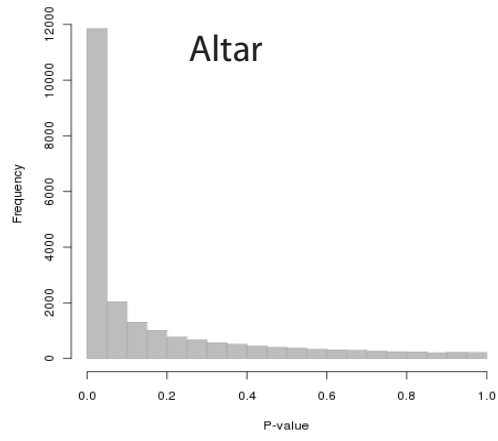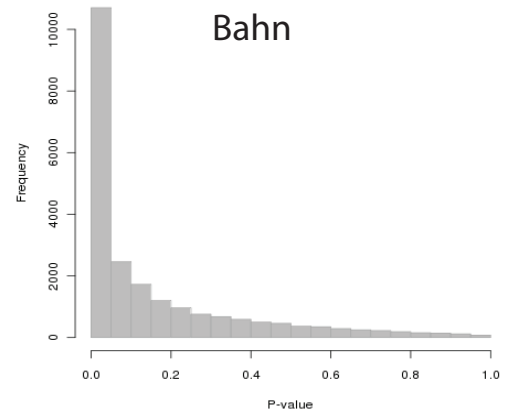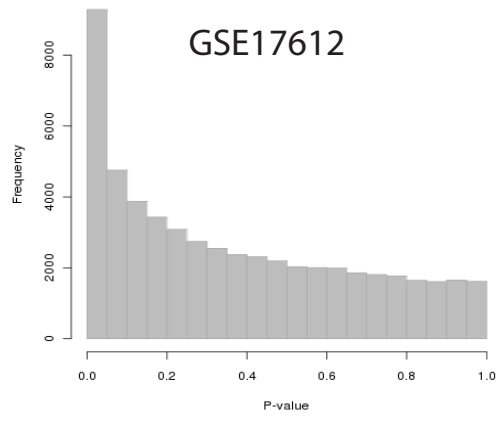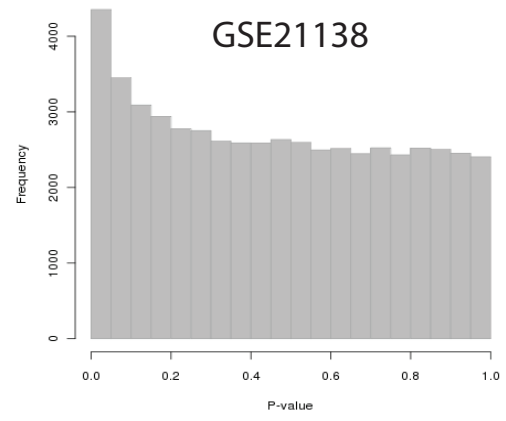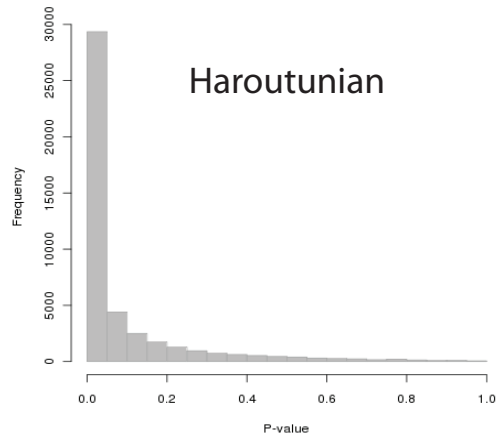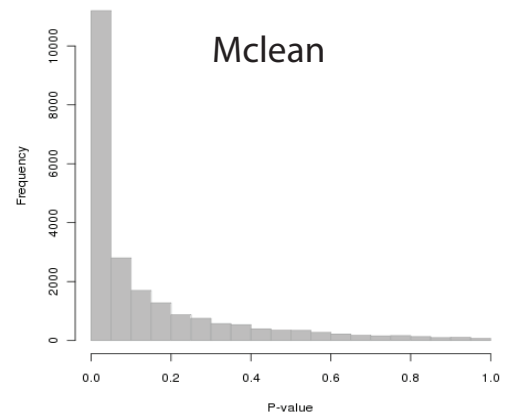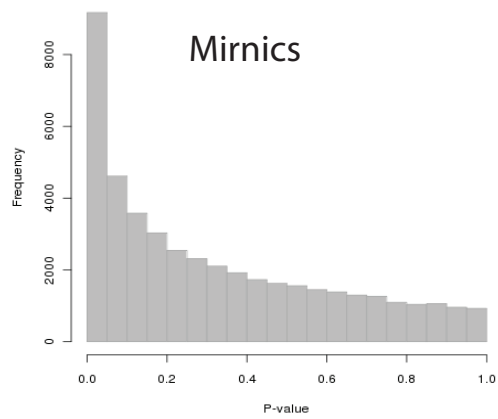

Supplement: NIHMS340048-supplement-2.pdf [file NIHMS340048-supplement-2.pdf]
